# Supplementary material for: Open cellular reactive porous membranes from high internal phase emulsions
Source: Royal Society of Chemistry journal article supplement (doi:10.1039/b807095d), 2008-01-01
Supplement: b807095d.pdf [file b807095d.pdf]

High internal phase emulsions were prepared as previously described (1). Emulsions were cast onto the glass support using casting blades with slits between 100 and 1000  $\mu\text{m}$ . Data regarding glass plates: plates 25 cm x 25 cm x 2 cm by Schott (Mainz, Germany) type B 270, polished down to 1  $\mu\text{m}$  surface roughness by Fotona, Ljubljana, Slovenia. Glass composition (as supplied by Schott, Germany):  $\text{SiO}_2$  68%,  $\text{Na}_2\text{O}/\text{K}_2\text{O}$  17%,  $\text{CaO}$  7%,  $\text{BaO}$  2%,  $\text{ZnO}$  4%,  $\text{TiO}_2$  1%,  $\text{Sb}_2\text{O}_3$  1%. Contact angle of water 20°. Emulsions were immediately after spreading covered with a thin second glass plate (4 mm thickness, same composition and polishing as the supporting plate), cured at 60°C for 24 h and washed with water and ethanol. Reactions with amines (three fold excess of amines) were carried out in dimethylformamide for 24 h at 60°C (1a, 1b, 1c) or 90°C (2a, 2b, 2c). SEM images were obtained using FEI Quanta200 3D electron microscope. FTIR spectra were recorded on Perkin Elmer 1650 FT-IR. Water flux measurements were performed using a AMICON 8400 membrane cell (deionised water, 20°C).

Membrane thickness measurements: At least 10 measurements were taken for each membrane across the surface. Figures in parenthesis show the range of results and from all measurements an average was calculated.

| Membrane | monomers |         |         |         | Water phase (%) | thickness <sup>a</sup> ( $\mu\text{m}$ ) |
|----------|----------|---------|---------|---------|-----------------|------------------------------------------|
|          | St (%)   | DVB (%) | VBC (%) | EHA (%) |                 |                                          |
| A1       | 80       | 20      | -       | -       | 80              | 270 (235-305)                            |
| A2       | 95       | 5       | -       | -       | 80              | 205 (180-240)                            |
| A3       | 98       | 2       | -       | -       | 80              | 240 (210-260)                            |
| A4       | 99       | 1       | -       | -       | 80              | 215 (175-240)                            |
| A5       | 95       | 5       | -       | -       | 75              | 30 (25-40)                               |
| A6       | 98       | 2       | -       | -       | 75              | 255 (225-285)                            |
| A7       | 98       | 2       | -       | -       | 85              | 230 (215-255)                            |
| A8       | 96       | 4       | -       | -       | 75              | 175 (160-205)                            |
| A9       | 96       | 4       | -       | -       | 85              | 285 (160-205)                            |
| A10      | 86       | 4       | -       | 10      | 75              | 345 (315-365)                            |
| A11      | 76       | 4       | -       | 20      | 75              | 405 (385-430)                            |
| A12      | 66       | 4       | -       | 30      | 75              | 250 (230-275)                            |
| B1       | 47,5     | 5       | 47,5    | -       | 80              | 375 (345-405)                            |
| B2       | 88       | 2       | 10      | -       | 80              | 200 (185-210)                            |
| B3       | 78       | 2       | 20      | -       | 80              | 220 (205-245)                            |
| B4       | 73       | 2       | 25      | -       | 75              | 225 (200-255)                            |
| B5       | 86       | 4       | 10      | -       | 80              | 215 (195-235)                            |
| B6       | 76       | 4       | 20      | -       | 80              | 215 (200-230)                            |
| B7       | 71       | 4       | 25      | -       | 75              | 230 (205-255)                            |

|    |    |   |    |    |    |               |
|----|----|---|----|----|----|---------------|
| B8 | 66 | 4 | 20 | 10 | 80 | 385 (365-405) |
| B9 | 56 | 4 | 20 | 20 | 80 | 430 (410-455) |

---

(1) P. Krajnc, J. F. Brown and N. R. Cameron, *Org. Lett.*, 2002, **4**, 2497-2500.

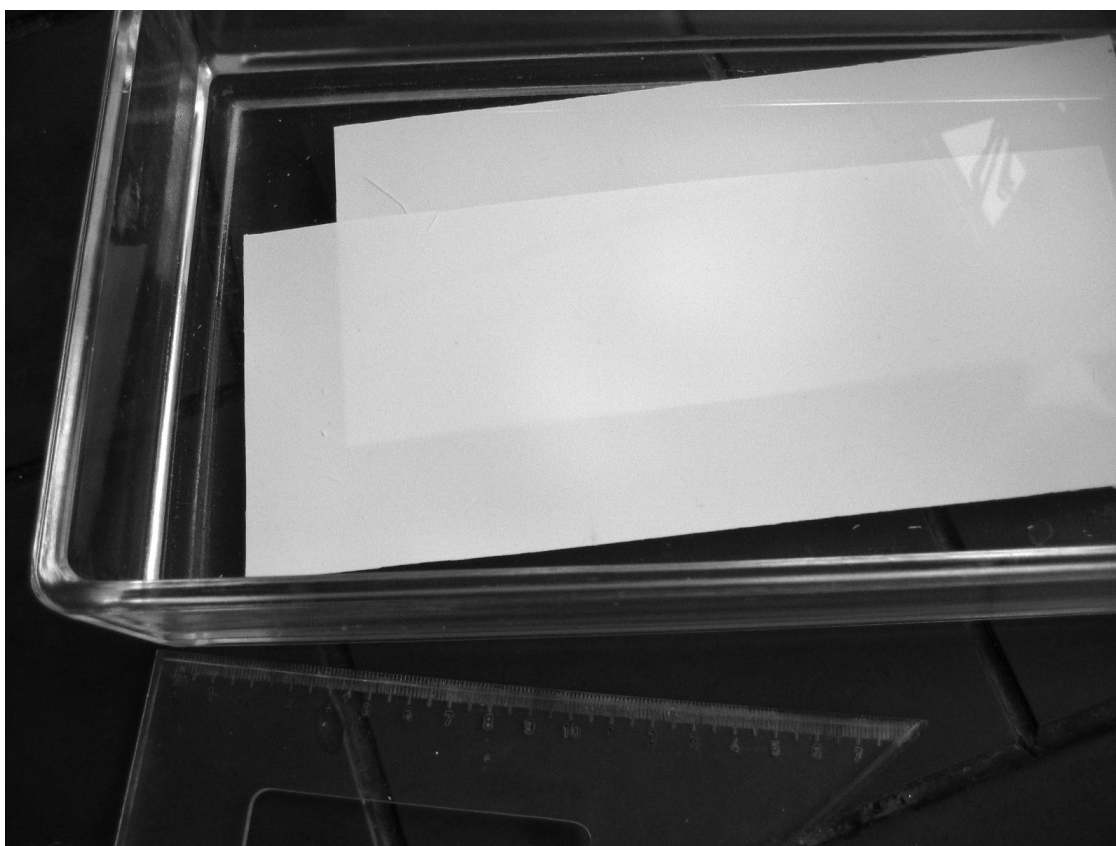

Image 1: polyHIPE membranes immersed in a bath

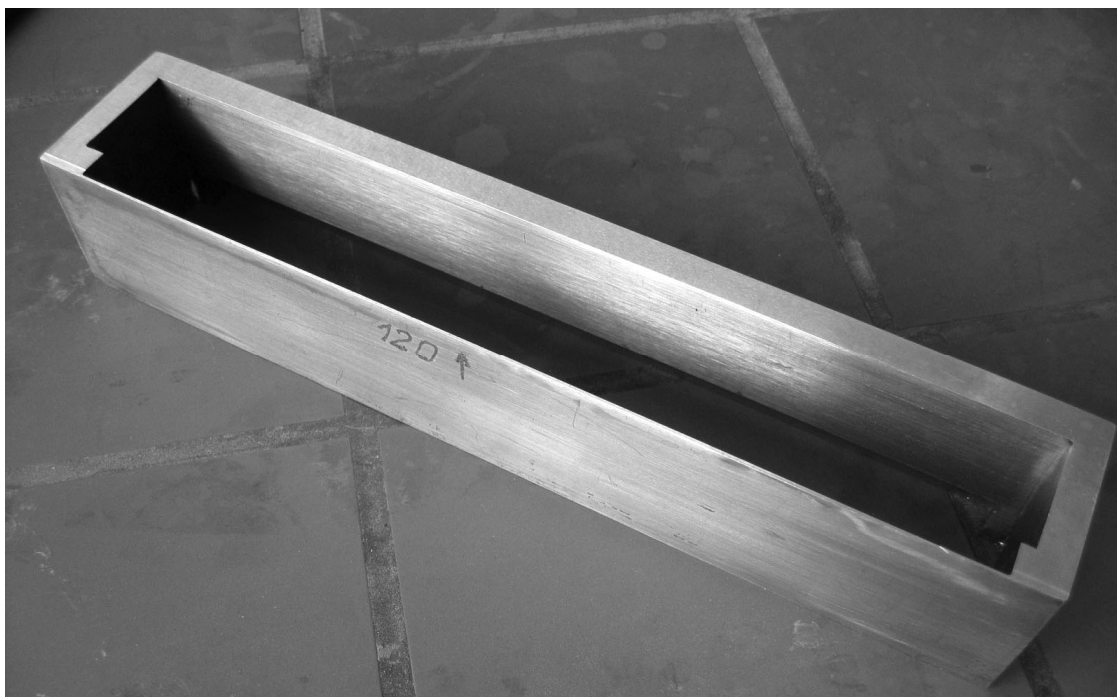

Image 2: casting blade
